Anesthesiology  
78:477-485, 1993  
© 1993 American Society of Anesthesiologists, Inc.  
J. B. Lippincott Company, Philadelphia

## Automated Real-time Analysis of Intraoperative Transesophageal Echocardiograms

Michael K. Cahalan, M.D.,\* Pompiliu Ionescu, M.D.,† Hewlett E. Melton, Jr., Ph.D.,‡ Susan Adler, M.D.,§  
Laura L. Kee, R.N., M.S.,|| Nelson B. Schiller, M.D.#

**Background:** Although transesophageal echocardiography (TEE) produces real-time images depicting left ventricular (LV) filling and ejection, the quantitative analysis of these images has been too time consuming to be of practical value in the operating room. Therefore, the authors investigated whether a new automated border detection system (ABD) could track the endocardial border continuously and compute the cross-sectional area of the LV cavity.

**Methods:** Using data from 25 patients who were monitored with TEE as part of their routine clinical care, the authors compared ABD estimates of LV end-diastolic area (EDA in square centimeters), end-systolic area (ESA in square centimeters), and fractional area change (FAC) with the laboratory measurements made independently by an expert.

**Results:** ABD slightly underestimated EDA ( $10.7 \pm 1.0$  vs.  $11.2 \pm 1.0$  cm<sup>2</sup>) and slightly overestimated ESA ( $5.6 \pm 0.7$  vs.  $4.8 \pm 0.6$  cm<sup>2</sup>, mean  $\pm$  standard error). However, when ABD tracking of the endocardial border was judged as "good" or "excellent" (84% of the patients at end diastole and 72% at end systole), the limits of agreement between ABD and the expert's findings were within the limits expected for two experts. By contrast, ABD significantly underestimated FAC ( $0.44 \pm 0.03$  vs.  $0.56 \pm 0.03$ ) and the limits of agreement between ABD and the expert were more than twice as great as expected for experts, even when ABD performance was judged as "excellent."

**Conclusion:** The authors conclude that, when ABD appears to be performing adequately, it underestimates LV FAC, but provides valid real-time estimates of LV EDA and ESA. Thus, it warrants further evaluation as a potentially powerful clinical and research tool. (Key words: Monitoring, transesophageal echocardiography; image processing, computer-assisted.)

TRANSESOPHAGEAL echocardiography (TEE) produces real-time cardiac images which, if quantitatively analyzed, provide a more accurate guide to filling of the left ventricle (LV) than that obtained by pulmonary artery pressure monitoring.<sup>1,2</sup> However, the required analysis has been too time consuming to be of practical value in the operating room. Therefore, we designed this prospective study to investigate whether a new automated border detection system (ABD) could track the endocardial border continuously and compute the cross-sectional area of the LV cavity.

### Materials and Methods

With the approval of our committee on human research, we studied 36 consecutive patients during cardiac or vascular surgery who were monitored with TEE as part of their routine clinical care. We learned how to use ABD in the first five patients and excluded data from these studies in our analysis. The ABD-equipped ultrasonograph we used was a prototype; however, a commercially available version has been introduced recently (Acoustic Quantification, Hewlett Packard, Andover, MA). The ABD device is a hardware-based algorithm that processes acoustic data before their compression into a video format. The physical principle underlying ABD is that the myocardium has a markedly higher efficiency in returning (scattering) the ultrasound signal back to the transducer than does blood. However, the returning signal contains noise (coherent speckle) that significantly impedes the identification of its scattering source.<sup>3</sup> Earlier, off-line methods for border detection reduced speckle by filtering,<sup>4</sup> but even with subsequent improvements in this approach, en-

\* Associate Professor of Anesthesia.

† Staff Research Associate in Anesthesia.

‡ Ultrasonics Imaging Group, Hewlett Packard Laboratories.

§ Research Fellow in Anesthesia.

|| Research Nurse in Echocardiography.

# Professor of Medicine and Radiology; Director of Adult Echocardiography.

Received from the Departments of Anesthesia and Medicine (Division of Cardiology), School of Medicine, University of California, San Francisco, and the Hewlett Packard Laboratories, Palo Alto, California. Accepted for publication November 16, 1992. Supported in part by National Institutes of Health grant 2P01AG03104-08, Bethesda, Maryland, and the Anesthesia Research Foundation, San Francisco, California. Dr. Melton is a full-time employee of Hewlett Packard, which supplied equipment for this study.

Address reprint requests to Dr. Cahalan: Department of Anesthesia, University of California, San Francisco, 521 Parnassus Avenue, San Francisco, California 94143-0648.

## REAL-TIME TEE ANALYSIS

6. Melton HEJ, Skorton DJ: Rational gain compensation for attenuation in cardiac ultrasonography. *Ultrason Imaging* 5:214-228, 1983
7. Melton HEJ, Collins SM, Skorton DJ: Automatic real-time endocardial edge detection in two-dimensional echocardiography. *Ultrason Imaging* 5:300-307, 1983
8. Cahalan MK, Weiskopf RB, Eger E2, Yasuda N, Ionescu P, Rampil JJ, Lockhart SH, Freire B, Peterson NA: Hemodynamic effects of desflurane/nitrous oxide anesthesia in volunteers. *Anesth Analg* 73:157-164, 1991
9. Bland JM, Altman DG: Statistical methods for assessing agreement between two methods of clinical measurement. *Lancet* 1:307-310, 1986
10. Smith JS, Roizen MF, Cahalan MK, Benefiel DJ, Beaupre PN, Sohn YJ, Byrd BF, Schiller NB, Stoney RJ, Ehrenfeld WK: Does anesthetic technique make a difference? Augmentation of systolic blood pressure during carotid endarterectomy: Effects of phenylephrine versus light anesthesia and of isoflurane versus halothane on the incidence of myocardial ischemia. *ANESTHESIOLOGY* 69:846-853, 1988
11. Geiser EA, Oliver LH, Gardin JM, Kerber RE, Parisi AF, Reichel N, Werner JA, Weyman AE: Clinical validation of an edge detection algorithm for two-dimensional echocardiographic short-axis images. *J Am Soc Echocardiogr* 1:410-421, 1988
12. Geiser EA, Conetta DA, Limacher MC, Stockton VO, Oliver LH, Jones B: A second-generation computer-based edge detection algorithm for short-axis, two-dimensional echocardiographic images: Accuracy and improvement in interobserver variability. *J Am Soc Echocardiogr* 3:79-90, 1990
13. Triulzi M, Weyman A: Normal cross-sectional measurements in adults, *Echocardiography*, Edited by Weyman A. Philadelphia, Lea & Febiger, 1982, p 497
14. Himelman RB, Cassidy MM, Landzberg JS, Schiller NB: Reproducibility of quantitative two-dimensional echocardiography. *Am Heart J* 115:425-431, 1988
15. Felner JM. *Echocardiography 1, The Heart*. New York, McGraw-Hill, 1990, p 2010
16. Vandenberg BF, Rath L, Stuhlmuller P, Melton HEJ, Skorton DJ: Estimation of left ventricular cavity area with a new, on line automated echocardiographic edge detection system (abstr). *J Am Coll Cardiol* 17:291A, 1991
17. Perez JE, Waggoner AD, Barzilai B, Melton HJ, Miller JG, Sobel BE: On-line assessment of ventricular function by automatic boundary detection and ultrasonic backscatter imaging. *J Am Coll Cardiol* 19: 313-320, 1992
